# Supplementary material for: A database resource and online analysis tools for coronaviruses on a historical and global scale
Source: Oxford University Press journal article supplement (doi:10.1093/database/baaa070), 2020-01-01
Supplement: baaa070_supp.zip [file baaa070_supp.zip]

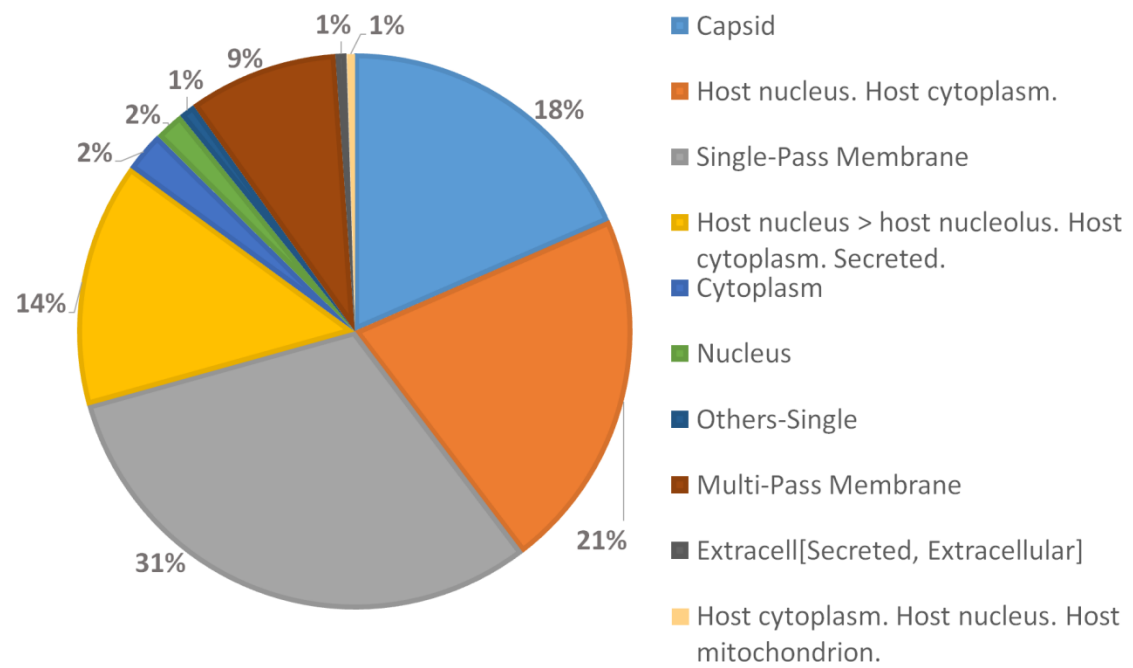

Figure S1. The percentages of coronavirus gene clusters in subcellular locations.

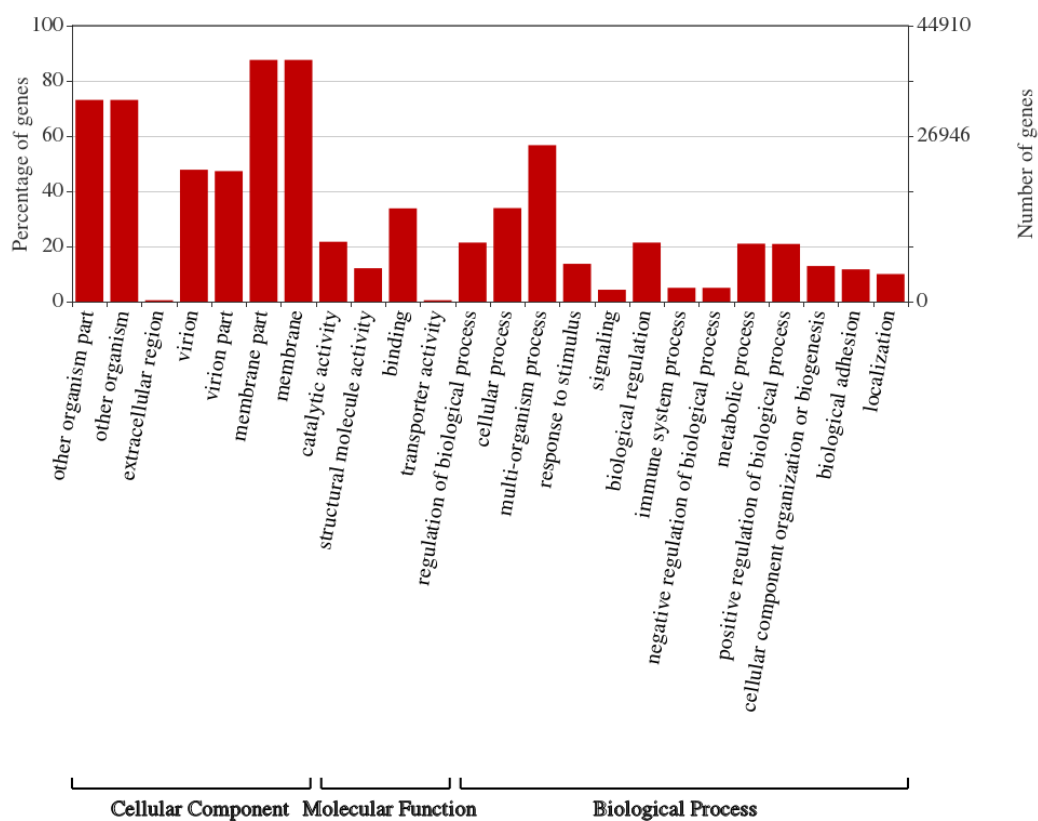

Figure S2. Gene ontology (GO) enrichments of conoravirus genes. This figure was drawn by WEGO.

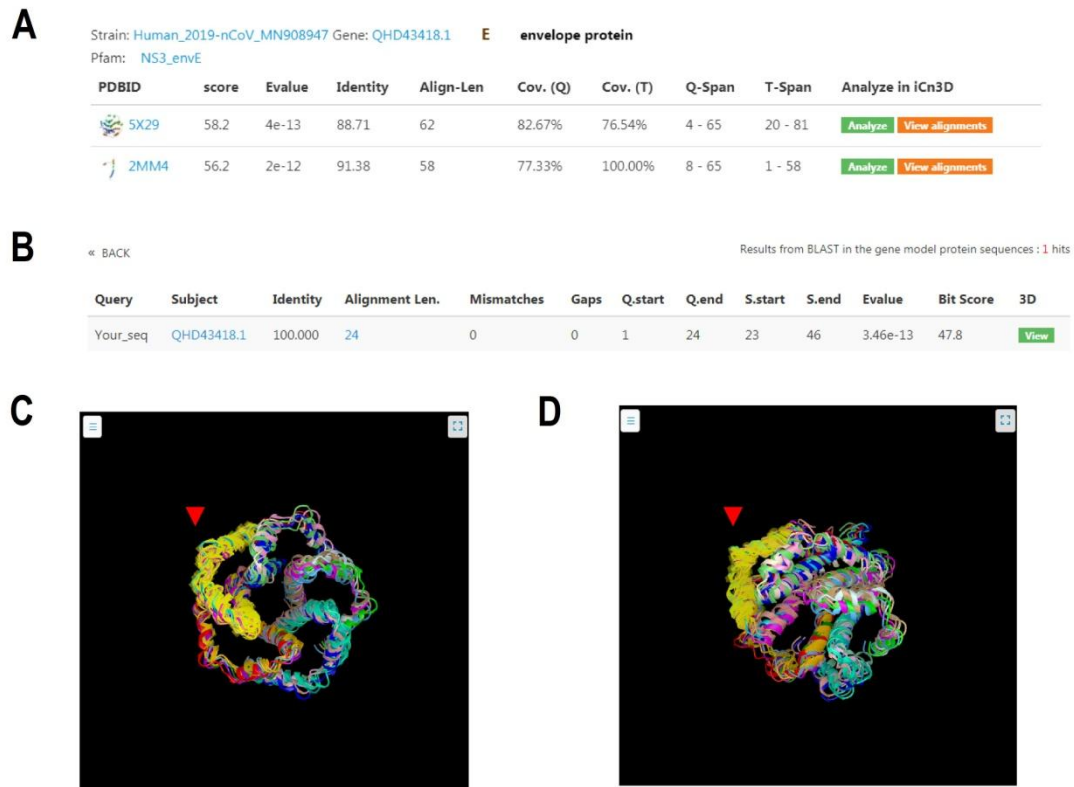

Figure S3. A introduction of the tool “Protein”. A is a part of listed protein 3D structure information of genes in the strain Human\_2019-nCoV\_MN908947. B is a snapshot of the result after online BLAST by querying “FVVFLVLTALRLCAYCCNI” in proteins of the strain Human\_2019-nCoV\_MN908947. C is a snapshot of the protein 3D view after clicking the button “Analysis” in A. Here, a red arrow points to the overlapped region of the Coronavirus gene QHD43418.1 and its 3D structural counterpart 5X29. C is a snapshot of the protein 3D view after clicking the button “View” in B. Here, a red arrow points to the overlapped region of the query sequence and the target protein structure 5X29.



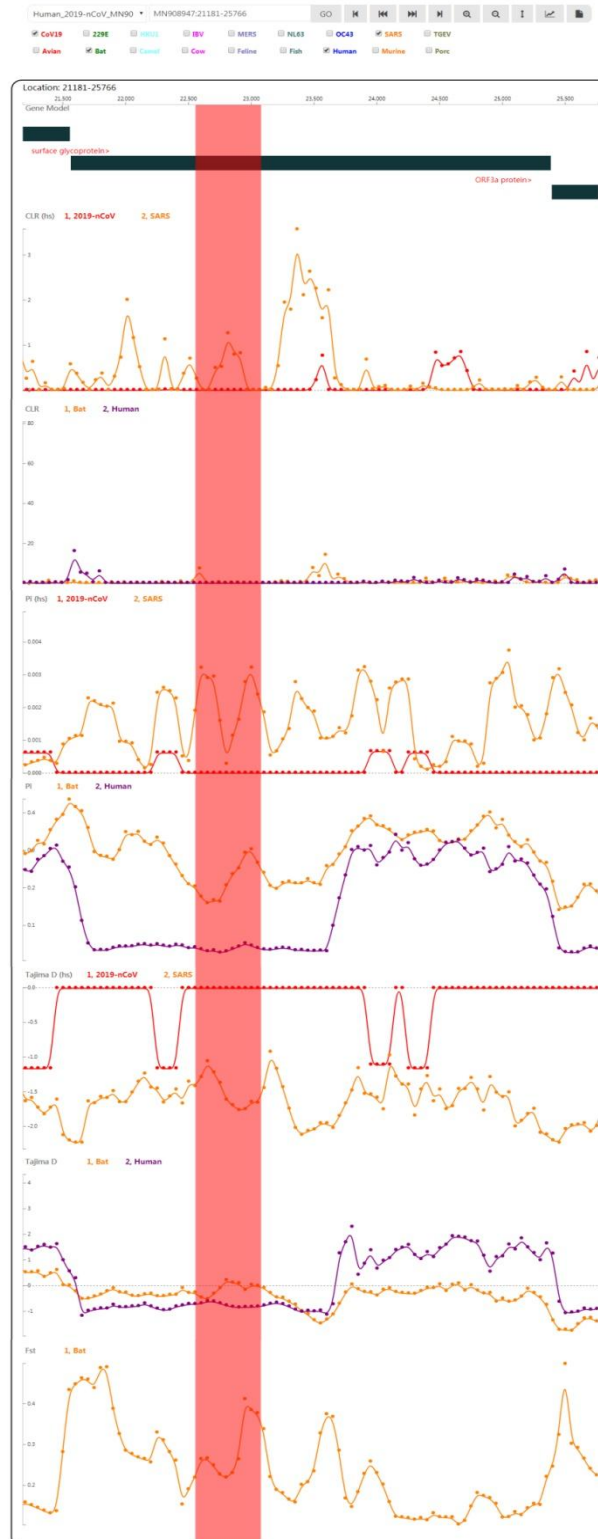

Figure S5. A snapshot of Human\_2019-nCoV\_ MN908947's spike glycoprotein in GBrowse with RBD (331AA to 550AA in the spike glycoprotein) marked by a red bar. Tracks of population genetic tests are listed following gene segments. "CLR (hs)" are CLR values within 2019-nCoV (SARS-CoV-2) strains (181 samples) and within SARS-nCoV strains (302 samples). "CLR" are CLR values within human isolates (972 samples) and bat isolates (176 samples). So do Pi and Tajima's D. Fst is calculated between human isolates and bat isolates.
